# Supplementary material for: Mechanisms for the retention of inorganic N in acidic forest soils of southern China
Source: PubMed Central journal article supplement (PMC3731645; doi:10.1038/srep02342), 2013-08-02
Supplement: srep02342-s1.pdf [file srep02342-s1.pdf]

**Title:** Mechanisms for retention of inorganic N in acid forest soils in southern China

Jin-bo Zhang<sup>1,2</sup>, Zu-cong Cai<sup>1,2\*</sup>, Tong-bin Zhu<sup>1,2</sup>, Wen-yan Yang<sup>1</sup>, Christoph Müller<sup>3</sup>

<sup>1</sup>School of Geography Sciences, Nanjing Normal University, Nanjing 210023, China

<sup>2</sup>State Key Laboratory of Soil and Sustainable Agriculture, Institute of Soil Science,  
Chinese Academy of Sciences

<sup>3</sup> Department of Plant Ecology, Justus-Liebig University Giessen, Heinrich-Buff-Ring  
26, 35392 Giessen, Germany

\*E-mail: [zccai@njnu.edu.cn](mailto:zccai@njnu.edu.cn) (Cai);

### **Separation of $\text{NH}_4^+$ and $\text{NO}_3^-$**

For isotopic analysis,  $\text{NH}_4^+$  and  $\text{NO}_3^-$  were separated by distillation with magnesium oxide and Devarda's alloy<sup>1,2</sup>. In detail, a portion of the extract was steam-distilled with MgO in a steam distillation system to isolate the  $\text{NH}_4^+$ . The sample in the flask was then distilled again after the addition of Devarda's alloy to isolate the  $\text{NO}_3^-$ . The liberated  $\text{NH}_3$  was trapped using a boric acid solution. The trapped N was acidified and converted to  $(\text{NH}_4)_2\text{SO}_4$  using a  $0.02 \text{ mol L}^{-1}$   $\text{H}_2\text{SO}_4$  solution. The  $\text{H}_2\text{SO}_4$  solution containing  $\text{NH}_4^+$  was then evaporated to dryness at  $65^\circ\text{C}$  in an oven and analysed for  $^{15}\text{N}$  abundance. Before separating  $\text{NH}_4^+$  and  $\text{NO}_3^-$  in the extract using a steam distillation system, the recovery of  $\text{NH}_4^+$  and  $\text{NO}_3^-$  from a standard solution ( $1 \text{ g NH}_4^+\text{-N L}^{-1}$  and  $1 \text{ g NO}_3^-\text{-N L}^{-1}$ ) was determined. The results showed that almost all of the  $\text{NH}_4^+\text{-N}$  in the solution could be recovered ( $>99\%$ ), and the recovery of  $\text{NO}_3^-$  was  $>95\%$ .

### **Comparison of dilution and $^{15}\text{N}$ tracing model methods**

To verify the utility of the  $^{15}\text{N}$  tracing model for simulating the gross rates of N transformation that occur simultaneously, we compared the results obtained using the  $^{15}\text{N}$  dilution method<sup>3</sup> with those obtained using the  $^{15}\text{N}$  tracing method employed in this study.

The gross rates of mineralization, nitrate production, and  $\text{NO}_3^-$  consumption per time interval and the average of all time intervals were calculated using the method of Kirkam and Bathalomew (1954)<sup>3</sup>. The results showed the calculated (dilution technique) and modelled ( $^{15}\text{N}$  tracing technique) mineralization and  $\text{NO}_3^-$  production

rates were similar ( $p < 0.01$ ; Fig. 2A, B). Based on the generally strong agreement between the values, we were confident enough to use the modelled rates, which provided details on the N transformation mechanisms and therefore a much more detailed view of actual N dynamics. Therefore, the modelled rates were used to compare soil N transformations between temperate and subtropical-tropical forest soils in the present investigation.

Samples 14 and 15 were from the same core, but the  $^{15}\text{N}$  tracing experiment was carried out in the laboratory for soil 14 (added  $50 \mu\text{g N g}^{-1}$  soil) and in the field for soil 15 (added  $2 \mu\text{g N g}^{-1}$  soil). The results showed that the N transformation rates determined in the laboratory and in the field were comparable (Table 2 in article), and thus the N transformations were not stimulated in the laboratory due to higher N application in the studied acid forest soils. The laboratory studies can provide essential information to mechanistically understand the observed N cycling process in the field<sup>4,5</sup>, despite some reported problems<sup>6</sup>. Nitrogen enrichment in humid subtropical soils could therefore be explained using data obtained by comparing the gross rates of N transformation in laboratory-incubated soils with those of temperate soils (Fig. 3 in article).

Previous studies, where the  $^{15}\text{N}$  tracing approach (section 2.4 in article) was used, showed that N consumption/production rates can be separated into process-specific gross rates to provide more details about soil N transformations, despite the fact that there is still some uncertainty about the general nature of the application of the  $^{15}\text{N}$  tracing model<sup>5,7,8,9,10,11</sup>. It should be stressed that, in general, individual gross N

transformation rates cannot be directly measured but can only be quantified with the help of analytic models, the most basic of which was presented by Kirkham and Bartholomew (1954)<sup>7</sup>. Subsequently, more complete and realistic analytic models have been developed. The latest are numerical <sup>15</sup>N tracing models in which the N transformation rate parameters are identified by non-linear optimization techniques<sup>7,10</sup>. We decided to calculate the total NH<sub>4</sub><sup>+</sup> and NO<sub>3</sub><sup>-</sup> production and consumption rates via the dilution method (Kirkham and Bathalomew 1954)<sup>7</sup> and the current <sup>15</sup>N tracing model. Comparison of the model results showed that the two methods provided comparable results for mineralization and NO<sub>3</sub><sup>-</sup> production rates (p < 0.01; Fig. 1A, B). The advantage of the <sup>15</sup>N tracing approach is that not only pool-specific gross N rates, but also individual N rates, can be determined. Furthermore, <sup>15</sup>N tracing models overcome the restrictions of zero-order kinetic rates that are assumed in the dilution approach. First-order and Michaelis-Menten kinetics are more realistic because they take into account a non-linear behaviour with respect to changing N concentrations. Discrepancies between the two methods may be associated with the use of different kinetics<sup>11</sup> (see also the result for NO<sub>3</sub><sup>-</sup> immobilization for the two neutral temperate forest soils [soil 7, 8], Fig. 1C).

**The results of analysis using average of soil properties and gross N transformation rates at each site**

Table 1 The result of T-test analysis using average of soil gross N transformation rates at each site comparing between northern and southern region

| Transformation process* | Levene's Test for Equality of Variances |       | t-test for Equality of Means |                    |       |                                           |       |       |
|-------------------------|-----------------------------------------|-------|------------------------------|--------------------|-------|-------------------------------------------|-------|-------|
|                         | F                                       | Sig.  | t                            | Degrees of freedom | Sig.  | 95% Confidence Interval of the Difference |       |       |
|                         |                                         |       |                              |                    |       | Lower                                     | Upper |       |
| M                       | Equal variances assumed                 | 1.346 | 0.284                        | -4.682             | 7     | 0.002                                     | -2.49 | -0.82 |
|                         | Equal variances not assumed             |       |                              | -4.345             | 4.256 | 0.011                                     | -2.68 | -0.62 |
| TNi                     | Equal variances assumed                 | 3.552 | 0.101                        | 0.666              | 7     | 0.527                                     | -1.16 | 2.07  |
|                         | Equal variances not assumed             |       |                              | 0.749              | 4.342 | 0.492                                     | -1.18 | 2.09  |
| O <sub>NH4</sub>        | Equal variances assumed                 | 3.332 | 0.111                        | 0.999              | 7     | 0.351                                     | -0.97 | 2.38  |
|                         | Equal variances not assumed             |       |                              | 1.127              | 4.224 | 0.32                                      | -1.00 | 2.41  |
| I <sub>NO3</sub>        | Equal variances assumed                 | 0.64  | 0.45                         | -5.818             | 7     | 0.001                                     | -0.80 | -0.34 |
|                         | Equal variances not assumed             |       |                              | -5.735             | 6.17  | 0.001                                     | -0.81 | -0.33 |
| NC                      | Equal variances assumed                 | 4.32  | 0.076                        | 1.145              | 7     | 0.29                                      | -0.57 | 1.63  |
|                         | Equal variances not assumed             |       |                              | 1.297              | 4.038 | 0.264                                     | -0.60 | 1.67  |

|                            |                             |       |       |        |       |       |        |         |
|----------------------------|-----------------------------|-------|-------|--------|-------|-------|--------|---------|
| NR                         | Equal variances assumed     | 0.022 | 0.886 | -5.002 | 7     | 0.002 | -1.38  | -0.49   |
|                            | Equal variances not assumed |       |       | -4.923 | 6.118 | 0.003 | -1.40  | -0.47   |
| Turnover time of organic N | Equal variances assumed     | 14.97 | 0.006 | 2.735  | 7     | 0.029 | 212.06 | 2921.27 |
|                            | Equal variances not assumed |       |       | 3.075  | 4.347 | 0.033 | 195.47 | 2937.87 |
| DNRA                       | Equal variances assumed     | 1.195 | 0.31  | -0.276 | 7     | 0.791 | -0.10  | 0.08    |
|                            | Equal variances not assumed |       |       | -0.256 | 4.287 | 0.81  | -0.12  | 0.10    |

\* M, mineralization rate of organic N pool; TNi, total nitrification rate (autotrophic nitrification + heterotrophic nitrification);  $O_{NH_4}$ , autotrophic nitrification;  $I_{NO_3}$ , immobilization of  $NO_3^-$ ; NC, nitrification capacity; NR,  $NO_3^-$  retention capacity; DNRA, dissimilatory  $NO_3^-$  reduction to  $NH_4^+$ .

Table 2 Pearson correlation coefficient between soil pH and autotrophic nitrification

( $O_{NH_4}$ ) nitrification capacity (NC) by using site-averages

| Factor |                     | $O_{NH_4}$ | NC      |
|--------|---------------------|------------|---------|
| pH     | Pearson Correlation | 0.934**    | 0.950** |
|        | Sig. (2-tailed)     | 0.000      | 0.000   |
|        | N                   | 9          | 9       |

\*\* . Correlation is significant at the 0.01 level (2-tailed).

Table 3 Pearson correlation coefficient between gross rates of mineralization and  $\text{NH}_4^+$  immobilization by using site-averages

| Factor               |                 | $\text{NH}_4^+$ immobilization rates |
|----------------------|-----------------|--------------------------------------|
| Gross mineralization | Pearson         | 0.799**                              |
|                      | Correlation     |                                      |
|                      | Sig. (2-tailed) | 0.010                                |
|                      | N               | 9                                    |

\*\* . Correlation is significant at the 0.01 level (2-tailed).

#### References

1. Feast, N.A. & Dennis, P.E. (1996). A comparison of methods for nitrogen isotope analysis of groundwater. *Chem. Geol.*, 129, 167-171.
2. Zhang, J.B., Zhu, T.B., Cai, Z.C. & Müller, C. (2011). Nitrogen cycling in forest soils across climate gradients in Eastern China. *Plant Soil*, 342, 419 – 432.
3. Kirkham, D. & Bartholomew, W.V. (1954). Equations for following nutrient transformations in soil, utilizing tracer data. *Soil Sci. Soc. Am. Pro.*, 18, 33–34.
4. Huygens, D., Boeckx, P., Templer, P., Paulino, L., Cleemput, O.V., Oyarzún, C., Müller, C. & Godoy, R. (2008). Mechanisms for retention of bioavailable nitrogen in volcanic rainforest soils. *Nat. Geosci.*, 1, 543-548.
5. Huygens, D., Rütting, T., Boeckx, P., Van Cleemput, O., Godoy, R. & Müller, C. (2007). Soil nitrogen conservation mechanisms in a pristine south Chilean *Nothofagus* forest ecosystem. *Soil Biol. Biochem.*, 39, 2448–2458.
6. Arnold, J., Corre, M.D., Veldkamp, E. (2008). Cold storage and laboratory incubation of intact soil cores do not reflect in-situ nitrogen cycling rates of tropical forest soils. *Soil Biol. Biochem.*, 40, 2480–2483.

7. Mary, B., Recous, S., Robin, D. (1998). A model for calculating nitrogen fluxes in soil using  $^{15}\text{N}$  tracing. *Soil Biol. Biochem.*, 30, 1963–1979.
8. Paterson, E. (2003). Importance of rhizodeposition in the coupling of plant and microbial productivity. *Eur. J. Soil Sci.*, 54, 741–750.
9. Luxhøi, J., Jensen, L.S. (2005). Gross N mineralization–immobilization rates in heterogeneous intact soil cores can be estimated without marked error. *Biol. Fertil. Soils*, 41, 280–283.
10. Müller, C., Rütting, T., Kattge, J., Laughlin, R.J. & Stevens, R.J. (2007). Estimation of parameters in complex  $^{15}\text{N}$  tracing models via Monte Carlo sampling. *Soil Biol. Biochem.*, 39, 715–726.
11. Rütting, T. & Müller, C. (2007).  $^{15}\text{N}$  tracing models with a Monte Carlo optimization procedure provide new insights on gross N transformations in soils. *Soil Biol. Biochem.*, 39, 2351–2361



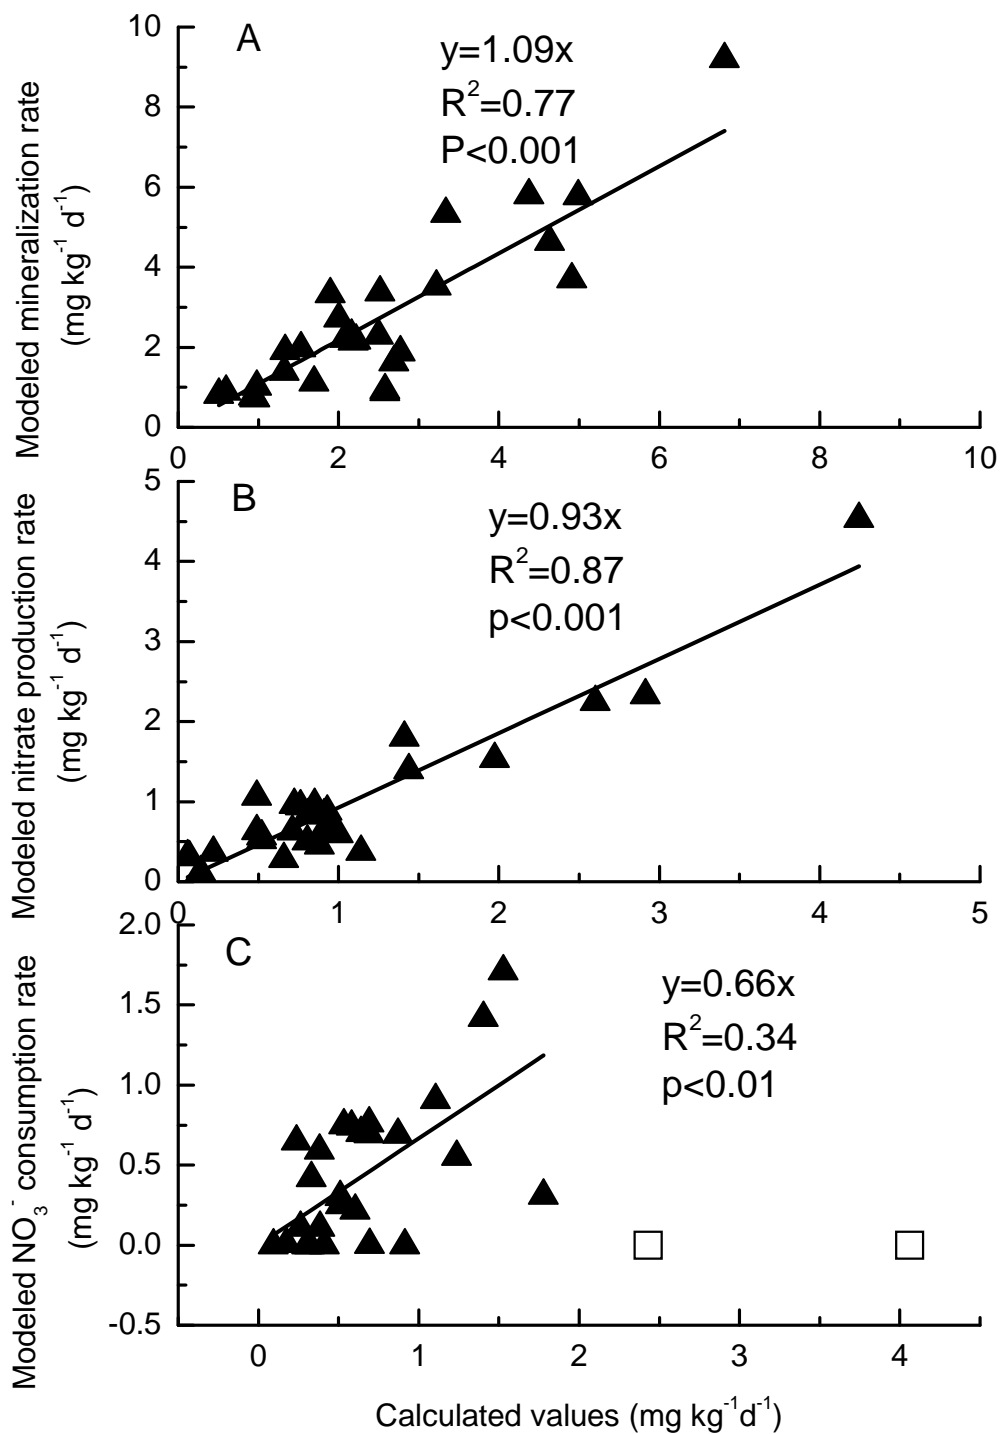

Fig. 1 Comparison of modelled and calculated total mineralization (A), nitrification (B) and NO<sub>3</sub><sup>-</sup> immobilization rates (C; mg N kg<sup>-1</sup> d<sup>-1</sup>)

The modelled rates were simulated using the <sup>15</sup>N tracing model (Müller et al., 2007)<sup>10</sup>, and the calculated rates were obtained using the method of Kirkam and Bathalomew (1954)<sup>7</sup>.
